# Supplementary material
Source: PubMed Central journal article supplement (PMC308790)
Supplement: nar_32_suppl-1_D86__1.pdf [file nar_32_suppl-1_D86__1.pdf]

## Supplementary Material (Table 1)

A list of transcription factors (TFs), members of known transcriptional modules and associated disease that is caused due to aberrations in that TF. The numbers of known target genes in human, mouse and rat, collected from literature are entered in Columns 2,3 & 4 respectively. Complete information about different TFs and their target gene promoters can be found in HemoPDB (<http://bioinformatics.med.ohio-state.edu/HemoPDB>).

| TF              | Human | Mouse | Rat | Members of known TF modules                                                                                              | Diseases associated with TF aberrations                                        |
|-----------------|-------|-------|-----|--------------------------------------------------------------------------------------------------------------------------|--------------------------------------------------------------------------------|
| AP-1            | 69    | 6     | 1   | ets, Oct-2, Spi-1, Pip, E2A, PU.1, NFKappaB                                                                              | AML, BCL, APL, ALL                                                             |
| AP-2            | 16    |       | 4   | DEK, p300/CBP, CITED2 and TFAP2A                                                                                         | Reduced expression yields BC & DSA                                             |
| BSAP            | 1     |       |     | NA                                                                                                                       | HL, subsets of BCL                                                             |
| C/EBP           | 6     |       |     | AP-1                                                                                                                     | HIV-1-A D, CNS Disease                                                         |
| C/EBPalpha      | 6     |       |     | NA                                                                                                                       | MDS, methylation and mutation & AML1/ETO fusion associated with AML            |
| C/EBPbeta       | 5     |       |     | PU.1                                                                                                                     | May contribute to progression of ovarian epithelial tumor cells                |
| c-Ets-1         | 3     |       |     | CBP/300, PEA3, AP-1, Jun/Fos, GATA-1, Fli-1, Sp1, TCF, SRF, CREB, ATF, E12, TEF3, PU.1, OCAB, Oct-2, C/EBP, AML1, GATA-3 | AML, Erythroblastosis in chicken, many human invasive tumors                   |
| c-Myb           | 4     | 1     |     | GATA-1                                                                                                                   | LD, leukemia and epithelial cancers of the breast, colon and gastro-oesophagus |
| c-Myc           | 6     | 4     |     | NA                                                                                                                       | BL, mutation leads to various solid tumors, bone sarcoma                       |
| CTF-NF1         | 4     |       |     | Sp1, E2F, N-myc                                                                                                          | AML, MDS                                                                       |
| CBF(RUNX1/CBFb) | 1     |       |     | NA                                                                                                                       | Mutations associated with FPD;Leukemias                                        |
| EGR1            | 2     |       |     | IgE                                                                                                                      | Human gliomas                                                                  |
| ELF-1           | 2     |       |     | NA                                                                                                                       | AML                                                                            |
| ets             | 8     | 3     |     | CBP/300, PEA3, AP-1, Jun/Fos, GATA-1, Fli-1, Sp1, TCF, SRF, CREB, ATF, E12, TEF3, PU.1, OCAB, Oct-2, C/EBP, AML1, GATA-3 | AML, Erythroblastosis in chicken, many human invasive tumors                   |
| Ets-1           | 2     |       |     | CBP/300, PEA3, AP-1, Jun/Fos, GATA-1, Fli-1, Sp1, TCF, SRF, CREB, ATF, E12, TEF3, PU.1, OCAB, Oct-2, C/EBP, AML1, GATA-3 | AML, Erythroblastosis in chicken, many human invasive tumors                   |
| Ets2            | 1     |       |     | CBP/300, PEA3, AP-1, Jun/Fos, GATA-1, Fli-1, Sp1, TCF, SRF, CREB, ATF, E12, TEF3, PU.1, OCAB, Oct-2, C/EBP, AML1, GATA-3 | AML, Erythroblastosis in chicken, many human invasive tumors                   |
| Fli-1           | 1     | 1     |     | NA                                                                                                                       | AML, erythroleukemia in mice, ET in human                                      |
| GATA            | 10    | 4     |     | ets, FOG, repressed by PU.1, LMO2, SCL2, Fli-1, Spi-1                                                                    | AML, HL, AMKL                                                                  |
| GATA-1          | 21    | 2     |     | ets, FOG, repressed by PU.1, LMO2, SCL2, Fli-1, Spi-1                                                                    | AML, HL, AMKL                                                                  |
| GATA-2          | 3     |       |     | ets, FOG, repressed by PU.1, LMO2, SCL2, Fli-1, Spi-1                                                                    | AML, HL, AMKL                                                                  |
| GM-CSF          | 1     |       |     | NF-kappaB                                                                                                                | AML                                                                            |
| ICSBP           | 2     |       |     | IRF-1                                                                                                                    | AML, CML                                                                       |
| Ikaros          | 1     |       |     | NA                                                                                                                       | CML, B-cell ALL                                                                |
| Lmo2            | 1     |       |     | TAL1/SCL, GATA                                                                                                           | T-ALL                                                                          |
| NF-1            | 2     | 3     | 3   | NA                                                                                                                       | JMML, Neurofibroma and neuroblastoma                                           |
| NFAT/Ets        | 2     |       |     | HTLV-1(p12(I))                                                                                                           | adult TCL                                                                      |
| NFAT            | 3     |       |     | HTLV-1(p12(I))                                                                                                           | adult TCL                                                                      |
| NF-kappaB       | 7     | 2     |     | AP-1, GMCSF                                                                                                              | AML, CLL                                                                       |
| l-Oct           | 2     |       |     | PU.1/ets1,Spi-1,Pip,E2A,AP-1                                                                                             | BCLL                                                                           |
| PU.1            | 13    |       |     | ets, Oct-2, Spi-1, Pip, E2A, AP-1                                                                                        | AML,BCL                                                                        |
| Spi-1           | 47    | 28    | 3   | CBP/p300, RAR/RXR, ets, SCL(LMO2, GATA-1, GATA-2,Ldb-1), suppressed by WT-1                                              | Erythroleukemia, chromosomal rearrangements yield T-ALL                        |
| STAT1           | 2     |       |     | JAK, interacts with STAT2 & p48/IRF-9 to form ISGF3                                                                      | HL                                                                             |
| STAT3           | 2     |       |     | JAK, interacts with STAT2 & p48/IRF-9 to form ISGF3                                                                      | HL                                                                             |
| WT-1            | 6     |       |     | PAR4, p53, WT or nephroblastoma, repressed by ZNF255                                                                     | EWS-WT1 chimeric product produces dsrs                                         |
| WT1-del2        | 1     |       |     | PAR4, p53, WT or nephroblastoma, repressed by ZNF255                                                                     | EWS-WT1 chimeric product produces dsrs                                         |

### **Disease abbreviations**

Acute Lymphoblastic Leukemia (**ALL**); Acute Megakaryoblastic Leukemia (**AMKL**)

Acute Myeloid Leukemia (**AML**); Acute Promyelocytic Leukemia (**APL**)

B-cell chronic lymphocytic leukemia (**B-CLL**); B-cell Lymphoma (**BCL**)

Breast Cancer (**BC**); Burkitt lymphoma (**BL**)

desmoplastic small round cell tumor (**dsrsc**); Duke's Stage Adenocarcinomas (**DSA**)

Ewing Tumor (**ET**); Familial platelet disorder (**FPD**)

HIV-1-associated disease and dementia (**HIV-1-A D**); Hodgkin's Lymphoma (**HL**)

Human Chronic Myeloid Leukemia (**CML**); Juvenile Myelomonocytic Leukemia (**JMML**)

Lymphoproliferative disorders (**LD**); Myelodysplastic syndromes (**MDS**)

T-cell acute lymphoblastic leukemia (**T-ALL**); T-cell Lymphoma/Leukemia (**TCL**)
